# Supplementary material for: Nanoarchitectonics of 3D-networked bio-based binders for silicon anodes in lithium-ion batteries based on dynamic hydrogen bonding
Source: Royal Society of Chemistry journal article supplement (doi:10.1039/d3se01323e), 2024-01-01
Supplement: d3se01323e1.pdf [file d3se01323e1.pdf]

## Electronic Supplementary Information

### **Nanoarchitectonics of 3D networked bio-based binders for silicon anodes in lithium-ion batteries based on dynamic hydrogen bonding**

Liang Yu <sup>a</sup>, Meng Chang <sup>a</sup>, Miaolan Zhang <sup>a</sup>, Yuting Yang <sup>a</sup>, Ken Chen <sup>a</sup>,

Tao Jiang <sup>a</sup>, Dean Shi <sup>a</sup>, Qunchao Zhang<sup>\*a</sup> and Jou You<sup>\*a</sup>

<sup>a</sup> Key Laboratory for the Green Preparation and Application of Functional Materials, Hubei Key laboratory of Polymer Materials, School of Materials Science and Engineering, Hubei University, Wuhan 430062,

China.

\*Corresponding authors. E-mail address: zhangqc76@sina.com,

yjgreen123@hubu.edu.cn

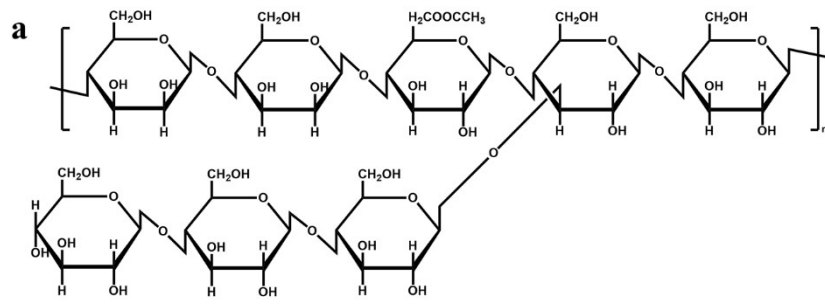

**b**

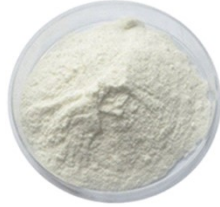

**Fig. S1** Konjac glucomannan (a) Molecular structure, (b) Konjac in extract.

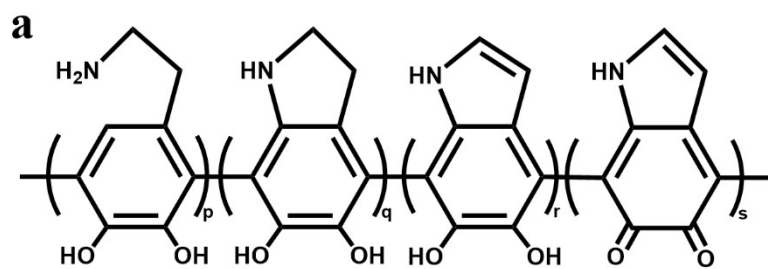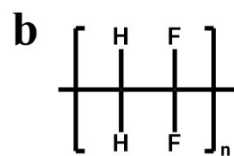

**Fig. S2** Molecular Structure of (a) PDA, (b) PVDF.

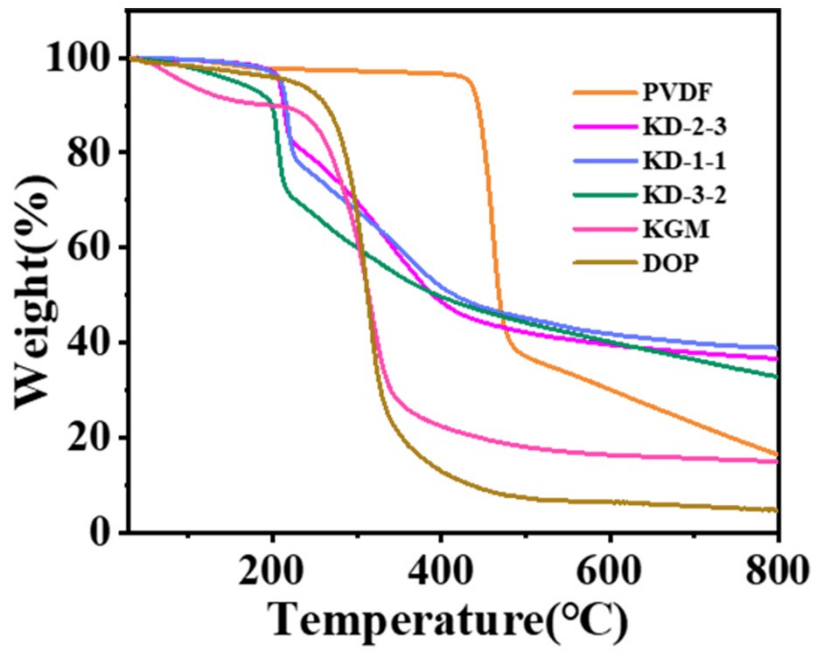

Fig. S3 Thermal weight loss curves for polymers.

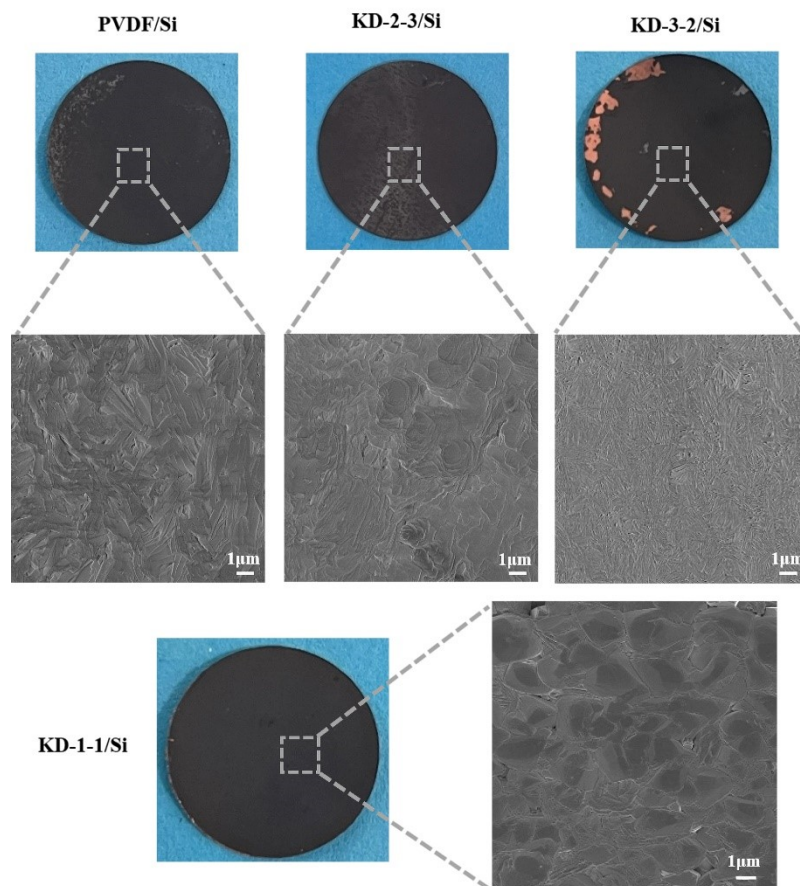

**Fig. S4** Surface morphology after 180h of immersion.

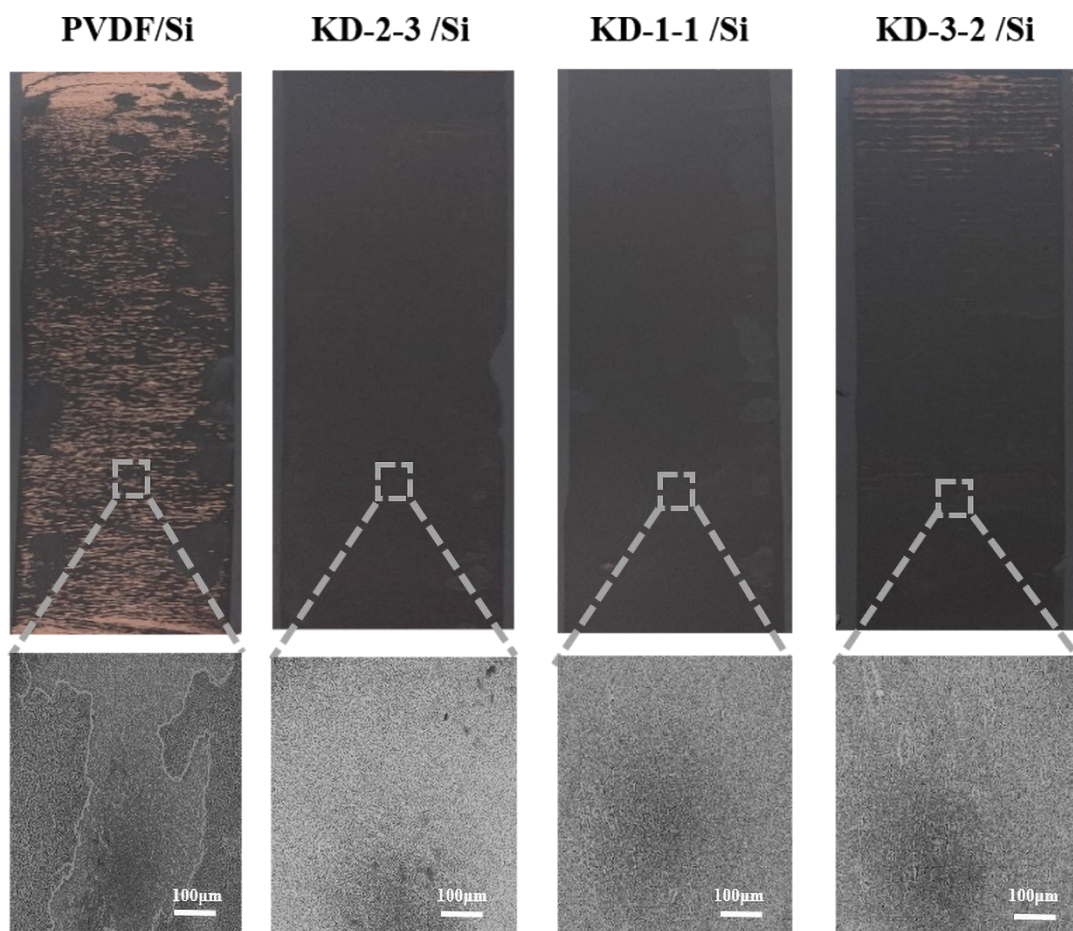

**Fig. S5** Surface morphology after peeling.

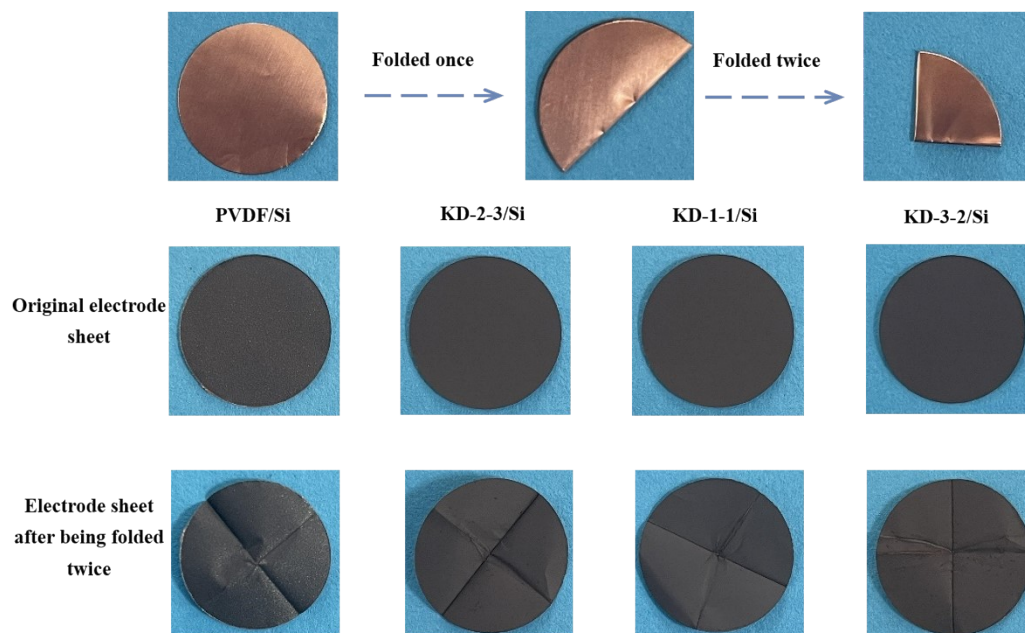

**Fig. S6** Surface de-powdering of electrodes after bending twice.

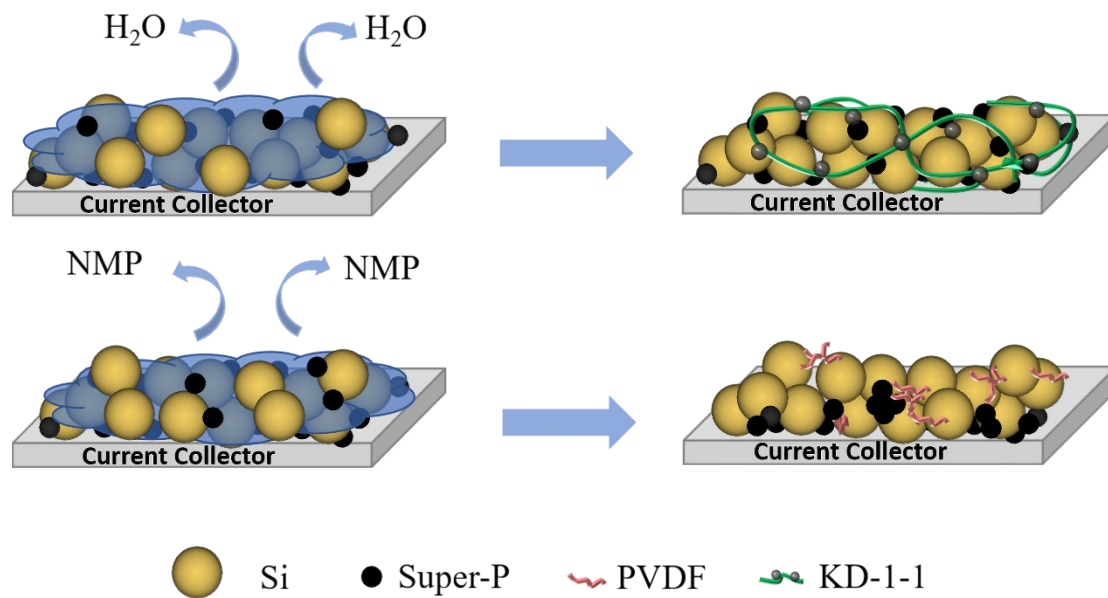

Fig. S7 The electrode composition distribution of KD-1-1 binder and PVDF binder after drying.



**Table S1** Comparison of the cyclic performance of Si anode materials for lithium-ion batteries with different binders reported in the previous works.

| Binder            | Mass loading<br>(mg cm <sup>-1</sup> ) | Mass ratio | Current rate<br>(C)           | Cycle<br>performance                         | Reference    |
|-------------------|----------------------------------------|------------|-------------------------------|----------------------------------------------|--------------|
| Alg-C-chitosan    | 0.56                                   | 5:3:2      | 0.024(0.1A g <sup>-1</sup> )  | 750 mAh g <sup>-1</sup><br>after 100 cycles  | [1]          |
| Li-Nafion         | 1.5-1.9                                | 20:3:2     | 0.036(0.15A g <sup>-1</sup> ) | 660 mAh g <sup>-1</sup><br>after 100 cycles  | [2]          |
| OS-CMC            | 0.4                                    | 6:2:2      | 0.095(0.4A g <sup>-1</sup> )  | 1922 mAh g <sup>-1</sup><br>after 100 cycles | [3]          |
| GG                | 0.64                                   | 6:2:2      | 0.095(0.4A g <sup>-1</sup> )  | 1323 mAh g <sup>-1</sup><br>after 100 cycles | [4]          |
| XG                | 0.59                                   | 6:2:2      | 0.095(0.4A g <sup>-1</sup> )  | 1026 mAh g <sup>-1</sup><br>after 100 cycles | [4]          |
| GA                | 0.75                                   | 6:2:2      | 0.095(0.4A g <sup>-1</sup> )  | 725 mAh g <sup>-1</sup><br>after 100 cycles  | [4]          |
| CMC/MAH           | 1.18                                   | 6:2:2      | 0.238(1A g <sup>-1</sup> )    | 996 mAh g <sup>-1</sup><br>after 120 cycles  | [5]          |
| CGG               | 0.8                                    | 6:2:2      | 0.238(1A g <sup>-1</sup> )    | 1138 mAh g <sup>-1</sup><br>after 200 cycles | [6]          |
| CMC-NaPAA-<br>PAM | \                                      | 6:2:2      | 0.1                           | 1210 mAh g <sup>-1</sup><br>after 150 cycles | [7]          |
| OG                | 1                                      | 6:2:2      | 0.1                           | 1434 mAh g <sup>-1</sup><br>after 50 cycles  | [8]          |
| TBA-VTLES         | 0.8-1.0                                | 8:1:1      | 0.2                           | 651 mAh g <sup>-1</sup><br>after 40 cycles   | [9]          |
| KGM/PDA           | 1.13                                   | 8:1:1      | 0.3                           | 1030 mAh g <sup>-1</sup><br>after 80 cycles  | This<br>work |

## Reference

- [1] Z.-H. Wu, J.-Y. Yang, B. Yu, B.-M. Shi, C.-R. Zhao and Z.-L. Yu, *Rare Met.*, 2019, **38**, 832–839.
- [2] R. R. Garsuch, D.-B. Le, A. Garsuch, J. Li, S. Wang, A. Farooq and J. R. Dahn, *J. Electrochem. Soc.*, 2008, **155**, A721.
- [3] R. You, X. Han, Z. Zhang, L. Li, C. Li, W. Huang, J. Wang, J. Xu and S. Chen, *Ionics*, 2019, **25**, 4109–4118.
- [4] S. Li, Z.-G. Wu, Y.-M. Liu, Z.-W. Yang, G.-K. Wang, Y.-X. Liu, Y.-J. Zhong, Y. Song, B.-H. Zhong and X.-D. Guo, *Ionics*, 2021, **27**, 1829–1836.
- [5] P. Li, G. Chen, Y. Lin, F. Chen, L. Chen, N. Zhang, Y. Cao, R. Ma and X. Liu, *Macro Chemistry & Physics*, 2020, **221**, 1900414.
- [6] S. Hu, Z. Cai, T. Huang, H. Zhang and A. Yu, *ACS Appl. Mater. Interfaces*, 2019, **11**, 4311–4317.

- [7] L. Yu, J. Liu, S. He, C. Huang, L. Gan, Z. Gong and M. Long, *Journal of Physics and Chemistry of Solids*, 2019, **135**, 109113.
- [8] H. Y. Ling, L. Hencz, H. Chen, Z. Wu, Z. Su, S. Chen, C. Yan, C. Lai, X. Liu and S. Zhang, *Sustainable Materials and Technologies*, 2021, **28**, e00283.
- [9] J. Yang, M. Shi, W. Wu, Q. Zhang, J. You, D. Shi and T. Jiang, *J Mater Sci*, 2021, **56**, 20126–20137.
